# Supplementary material
Source: Springer Nature journal article supplement (https://www.springermedizin.de/resource/supplementary/12957_2013_1408_MOESM16_ESM.pdf/9562532)

Left

A. Iliaca externa

Vascular  
mesometrium

Arteria umbilicalis

Cervicovaginal  
junction

N. obturatorius

Left uterine branch of plexus  
hypogastricus inferior

Vagina

Ureter

Plexus hypogastricus  
inferior

Ligamentous  
mesometrium

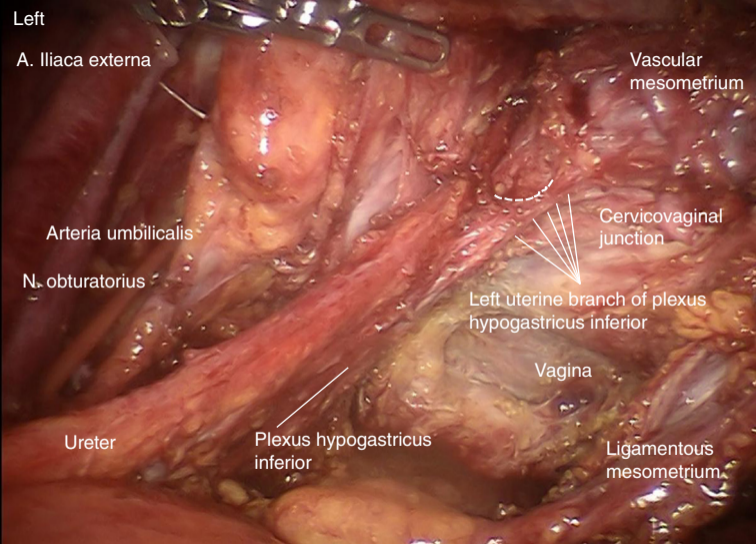

Supplement: MOESM16 [file 9562532]
